# Supplementary material
Source: MDPI journal article supplement (https://www.mdpi.com/2075-163X/11/7/727)
Supplement: s1 [file s1]

## Supplementary Materials

### Revisiting the Bøggild Intergrowth in the Iridescent Labradorite Feldspars: Ordering, Kinetics, and Phase Equilibria

Shiyun Jin<sup>1,2</sup>, Huifang Xu\*<sup>1</sup>, and Seungyeol Lee<sup>1,3,4</sup>

1. Department of Geoscience, University of Wisconsin-Madison, 1215 W. Dayton Street, Madison, WI 53706, USA.
2. Gemological Institute of America, 5355 Armada Drive, Carlsbad, California 92008, USA
3. USRA Lunar and Planetary Institute, 3600 Bay Area Boulevard, Houston, TX 77058, USA
4. Astromaterials Research and Exploration Directorate, NASA Johnson Space Center, 2101 NASA Parkway, Houston, TX 77058, USA

\* Corresponding author: [hfxu@geology.wisc.edu](mailto:hfxu@geology.wisc.edu)

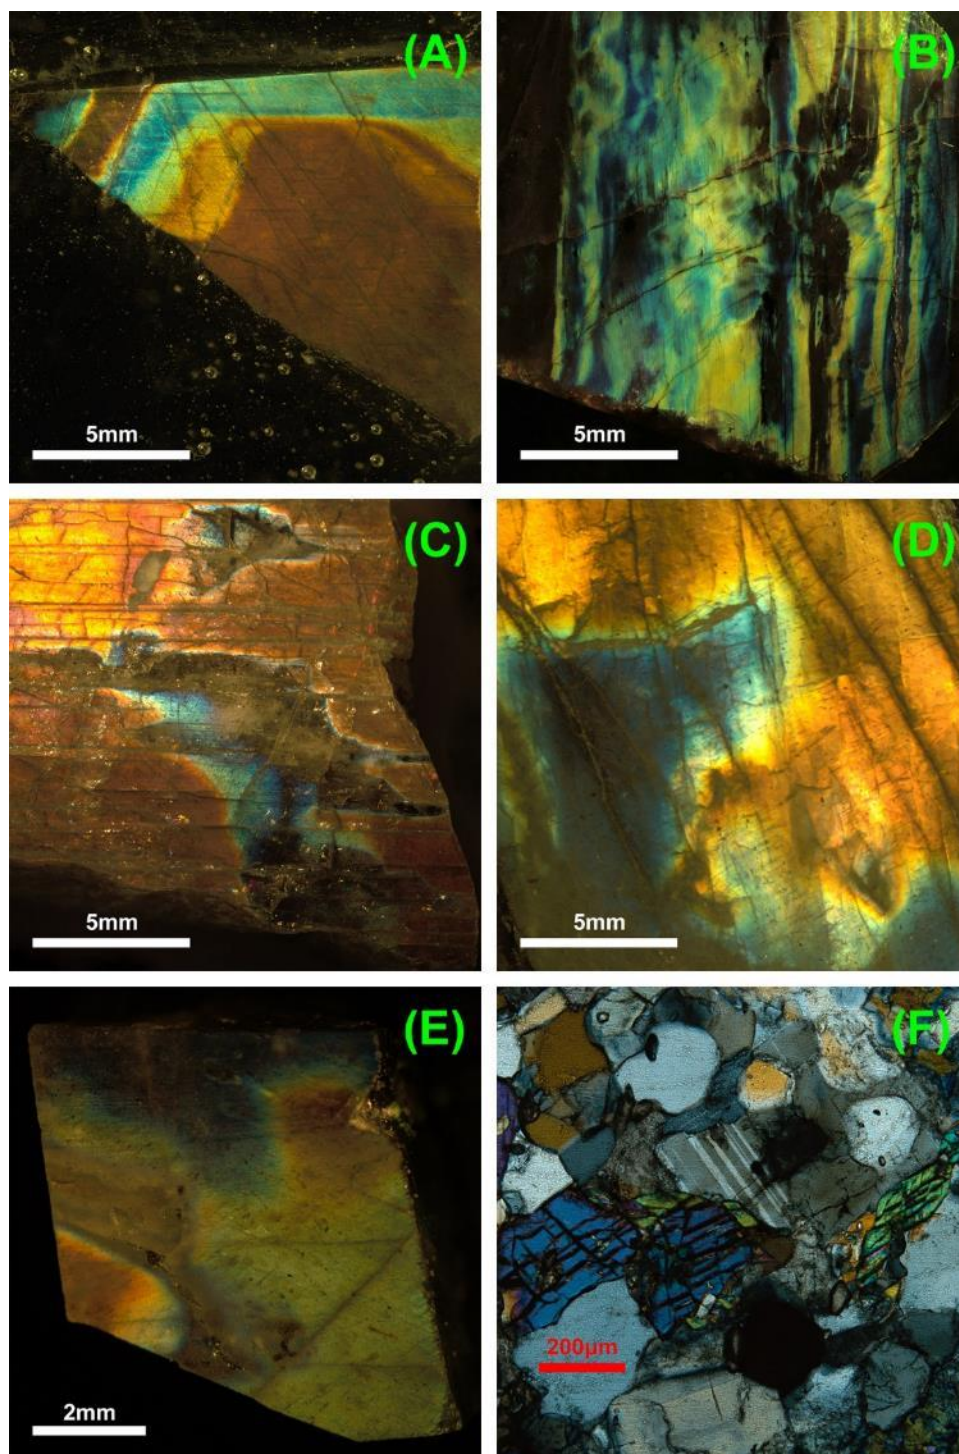

Figure S1 Optical images of the samples studied in this paper. (A) sample Gem118 from Finland; (B) sample VB (Volga Blue) from Ukraine; (C) sample R2923 from Sweden; (D) sample MAD from Madagascar. (E) sample Gem113 from Labrador, Canada; (F) thin section of sample 987L, transmitted cross-polarized light.

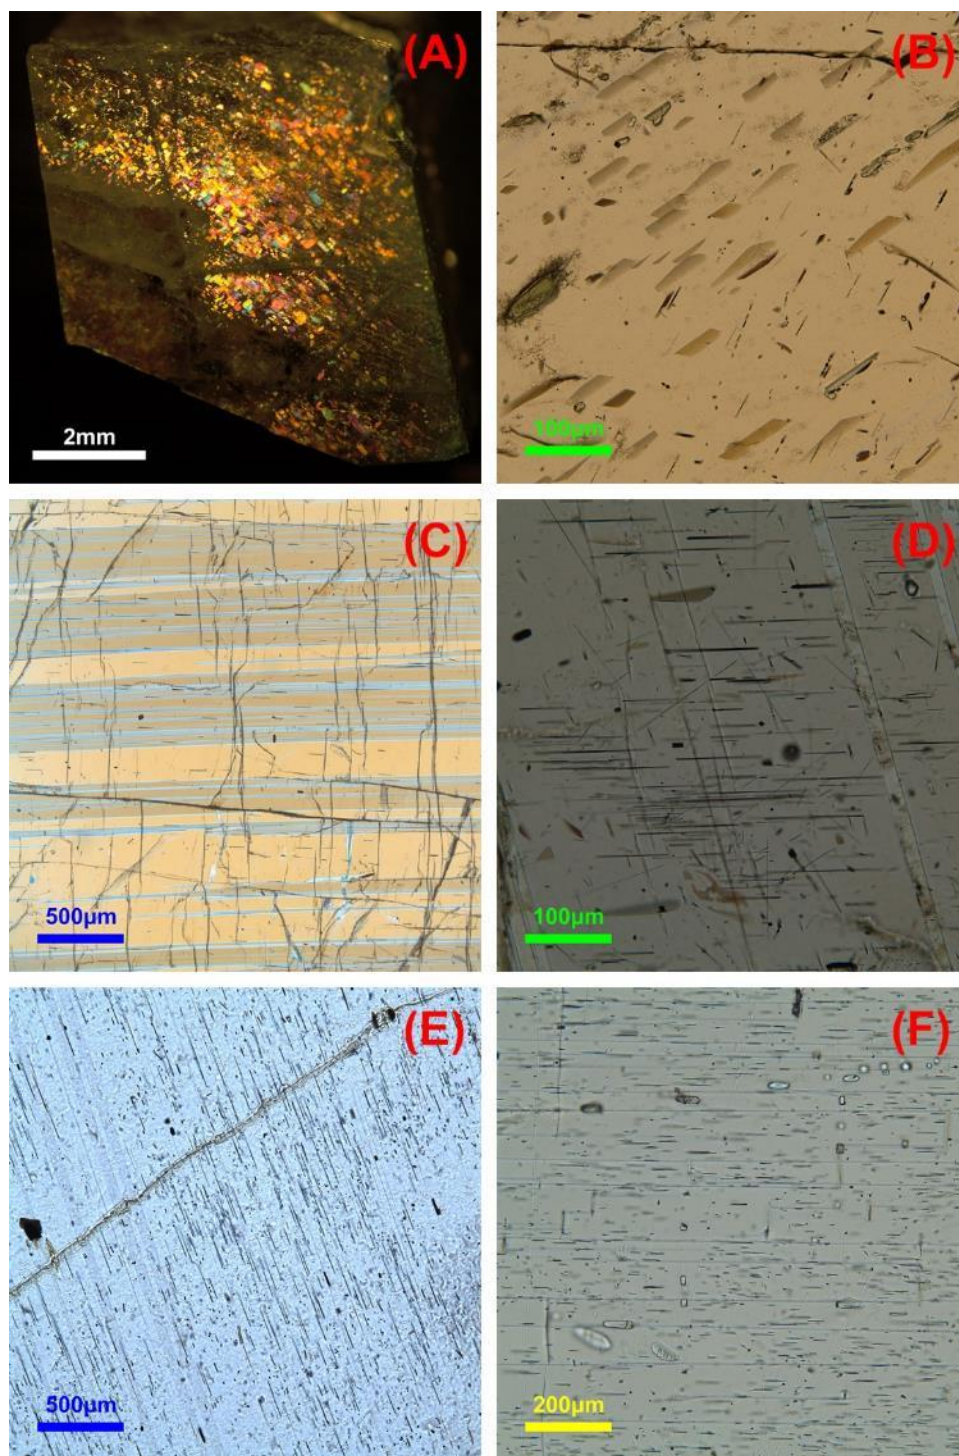

Figure S2 Optical images of the igneous samples studied in this paper showing the inclusions. (A) brilliant reflections from the flaky inclusions inside Gem113 with light shined from a different angle as in Figure S1E; (B) flaky and needle-like inclusions in thin section of sample Gem113; (C) thin section of sample MAD with a few acicular inclusions; (D) thin section of sample R2923; (E) thin section of sample VB with high density acicular inclusions; (F) thin section of sample Gem118 with acicular inclusions and fluid inclusions.



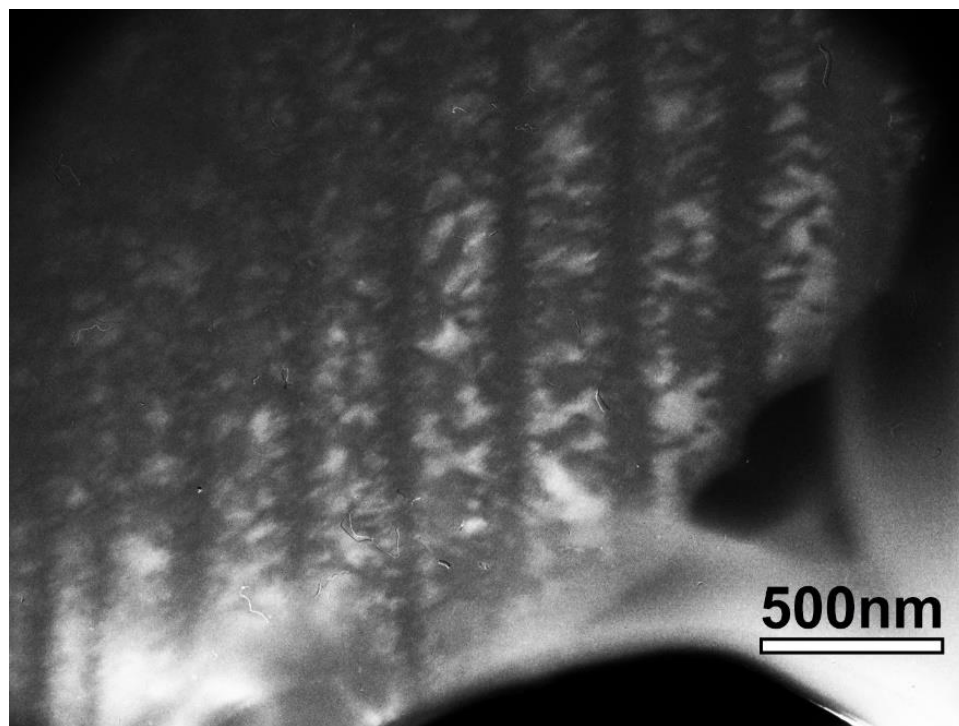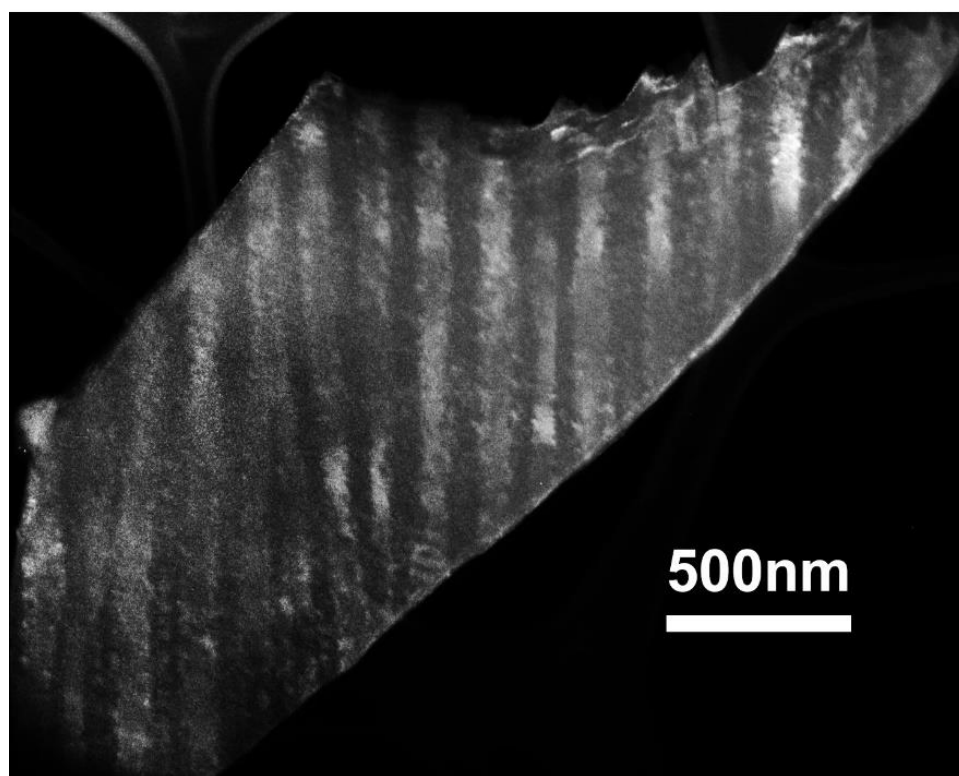

Figure S3 Dark field TEM images of the red-iridescent (top) and the blue-iridescent (bottom) areas in sample Gem118 from Finland. The contrast in the lamellae is resulted from out-of-phase boundary among the neighboring domains of the modulated structure.

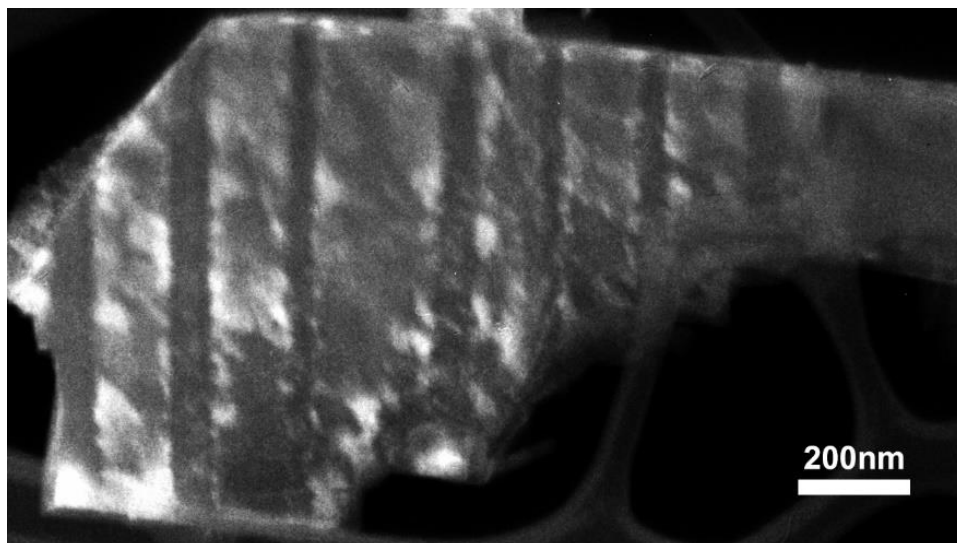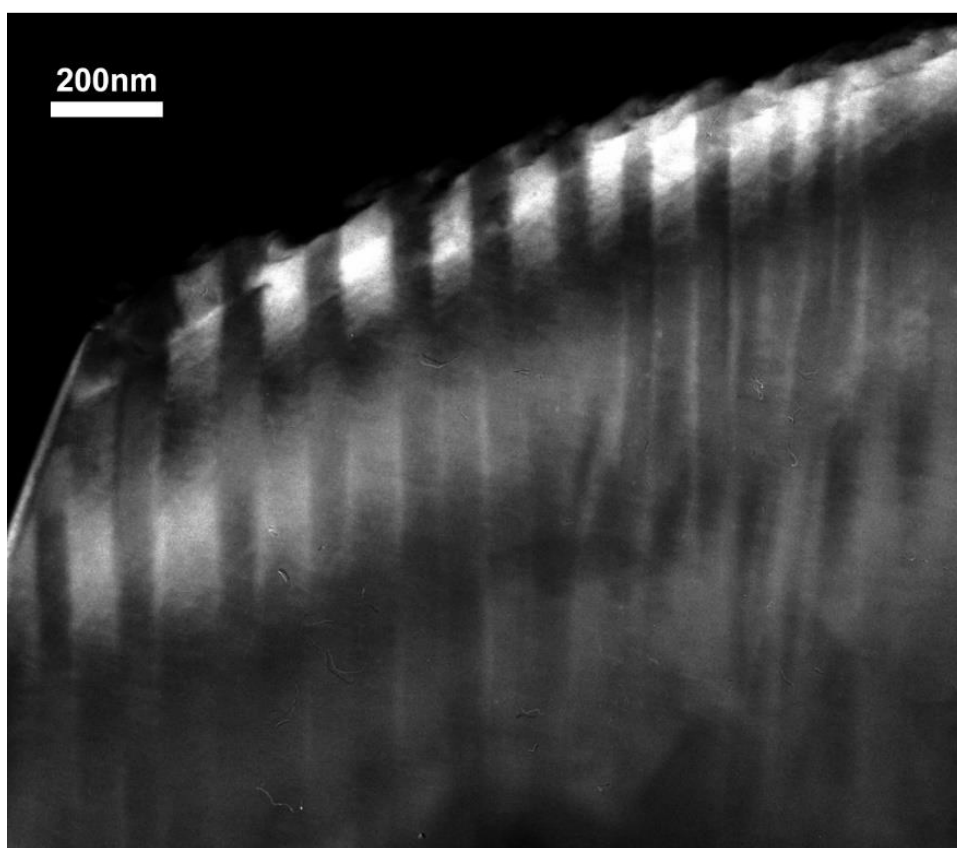

Figure S4 Dark field images showing exsolution lamellae of the red-iridescent area (top) and the blue-iridescent area (bottom) in sample Gem113 from Labrador, Canada.

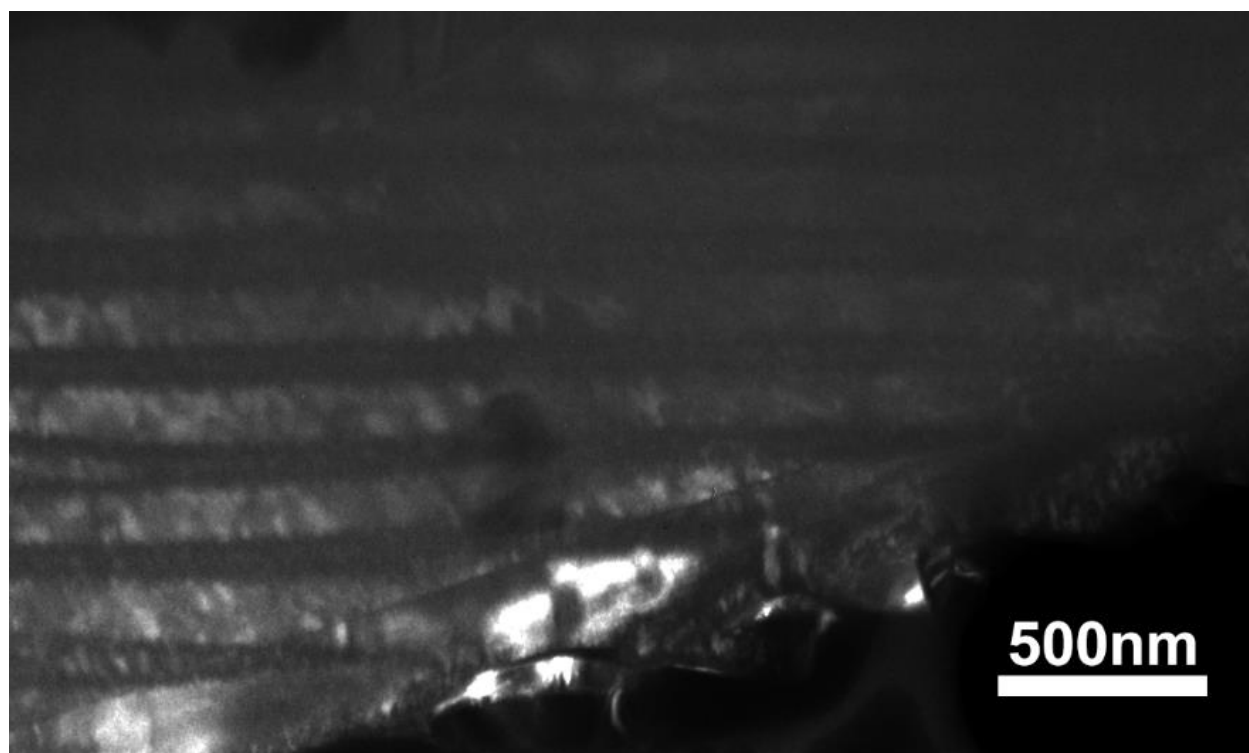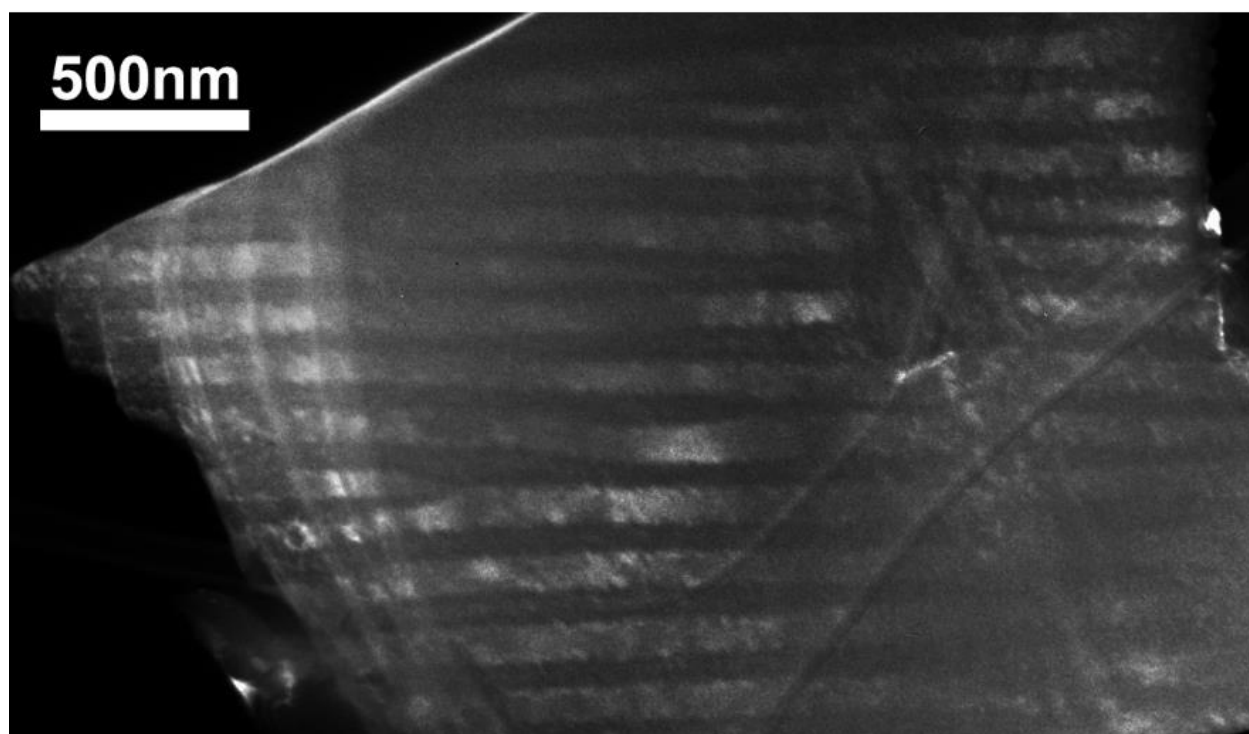

Figure S5 Dark field images showing exsolution lamellae of the orange-iridescent area (top) and the blue-iridescent area (bottom) in sample MAD from Madagascar.

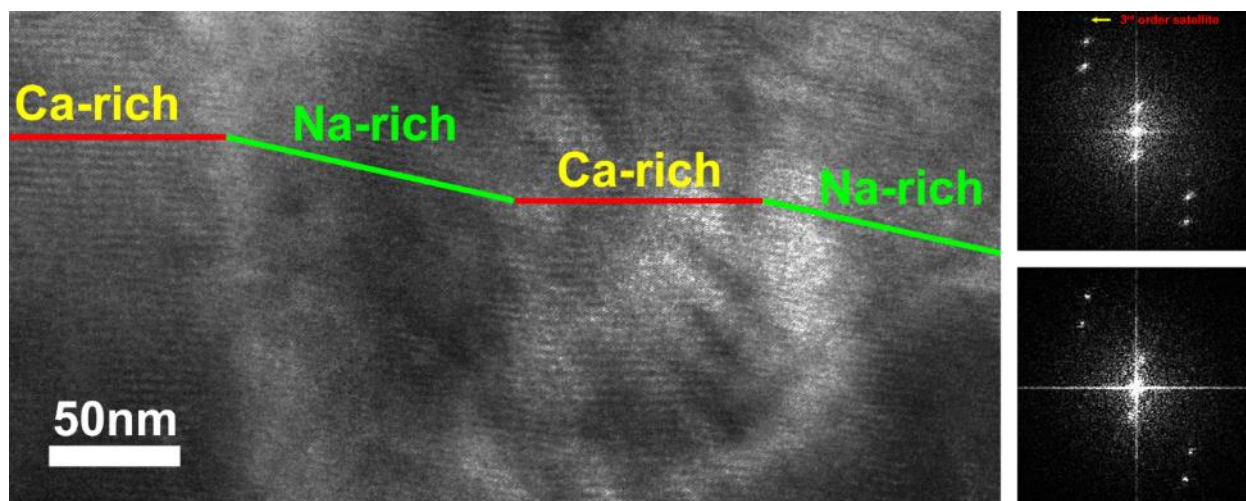

Figure S6 High-resolution TEM image of the blue-iridescent MAD sample, along with the FFT of selected area in each individual lamella. The difference in the modulation orientation is  $\sim 12^\circ$ , which is smaller than the difference in the blue Gem113 sample as shown in Figure 1.

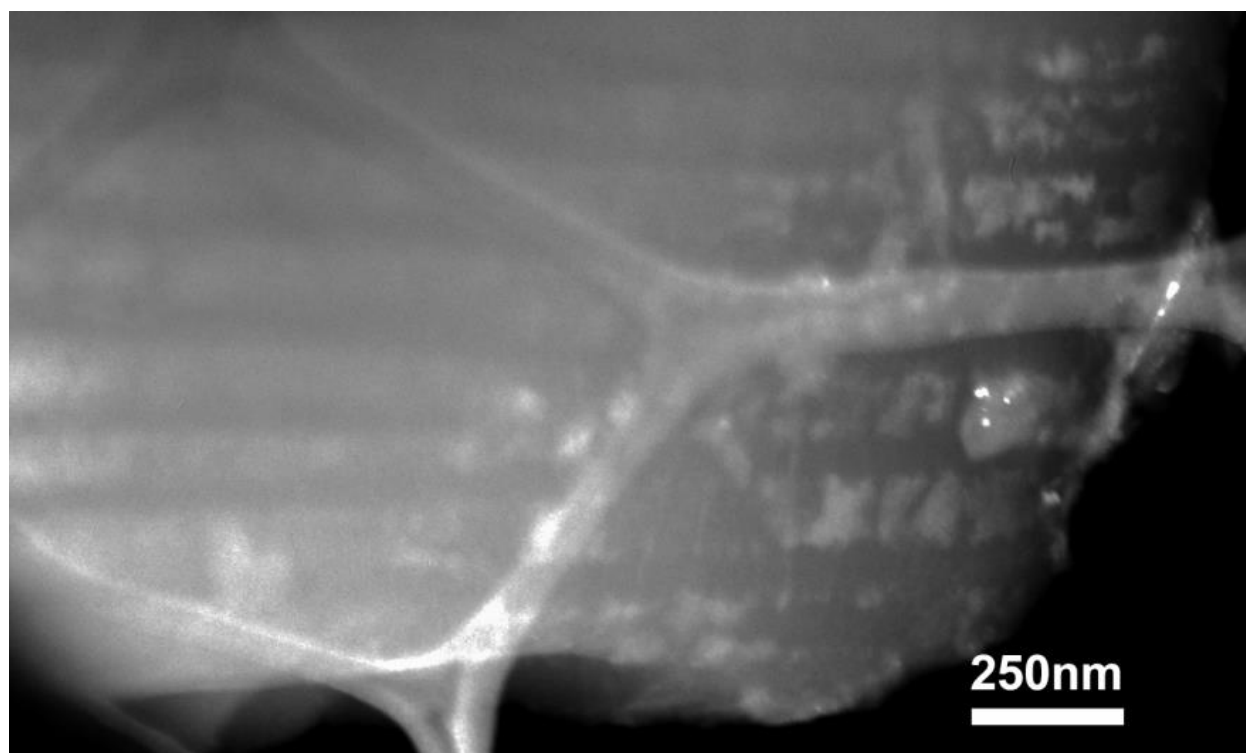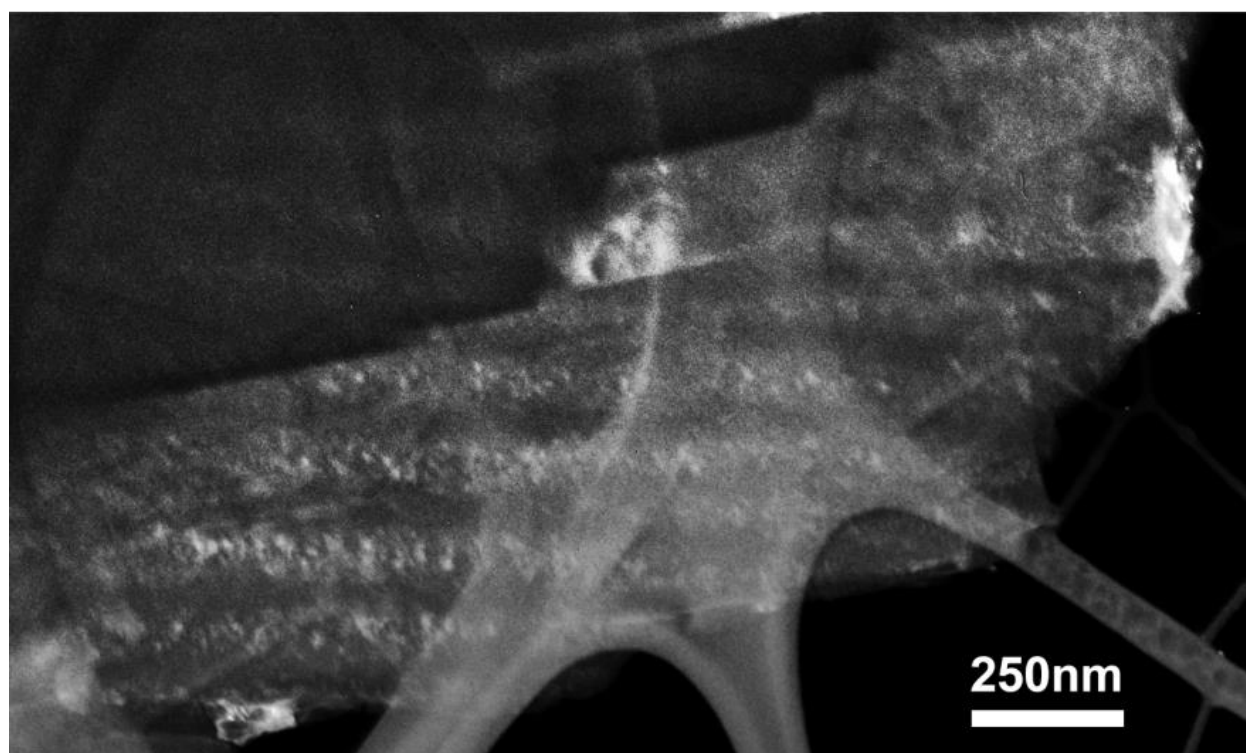

Figure S7 Dark-field images of the yellow (top) and green-blue (bottom) area in sample VB. The lamellae texture is very similar to the other samples as shown in Figures 2-4.



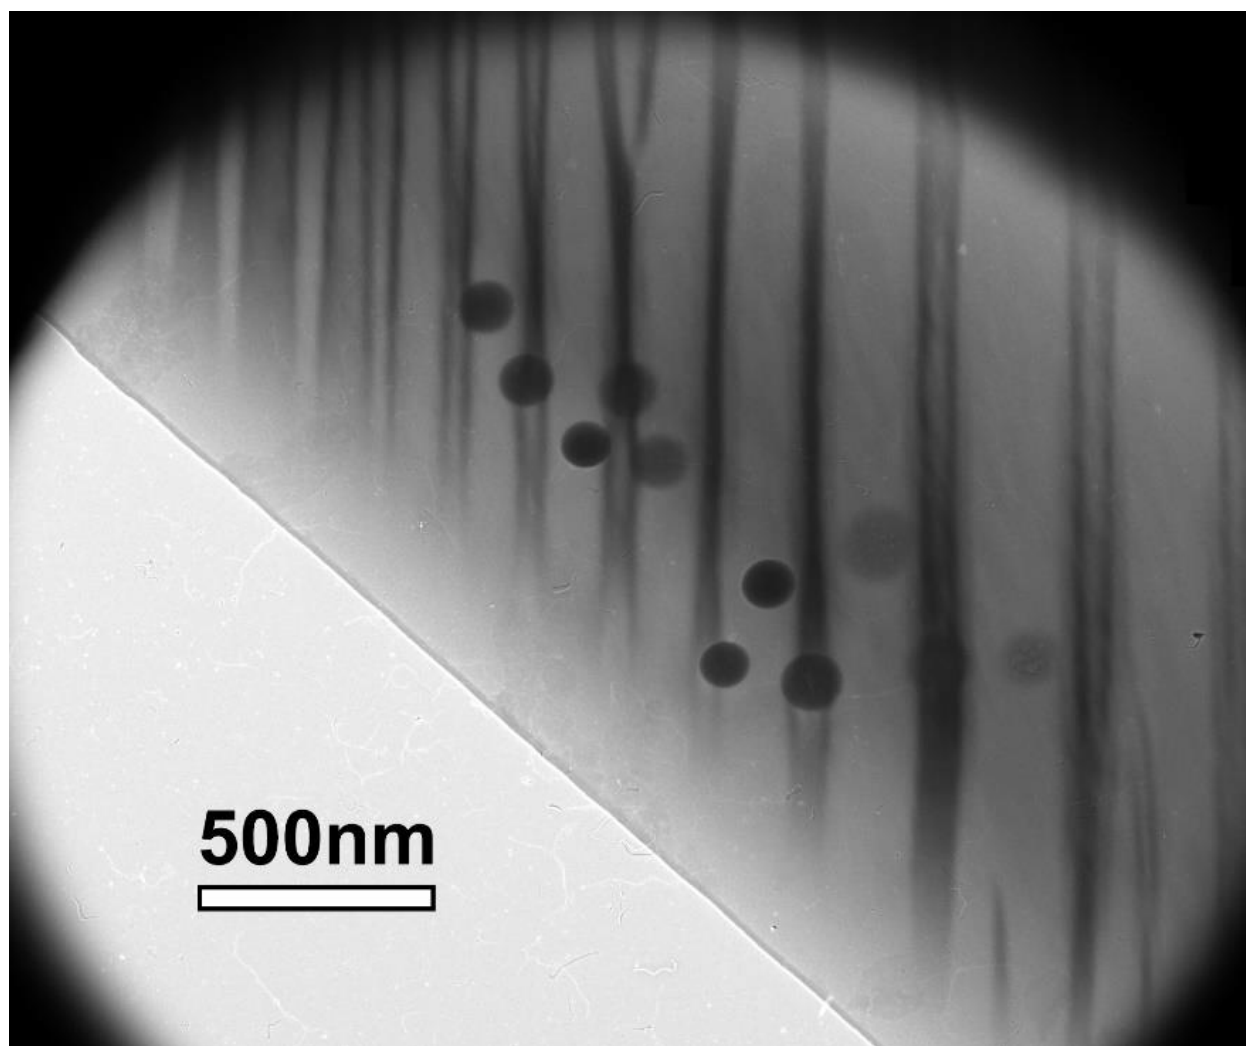

Figure S8 Bright-field TEM image of sample 987L, showing exsolution lamellae of various thickness. The wider lamellae are Ca-rich and thinner ones Na-rich. The dark circles are left by focused electron beams for collection EDS spectrum.

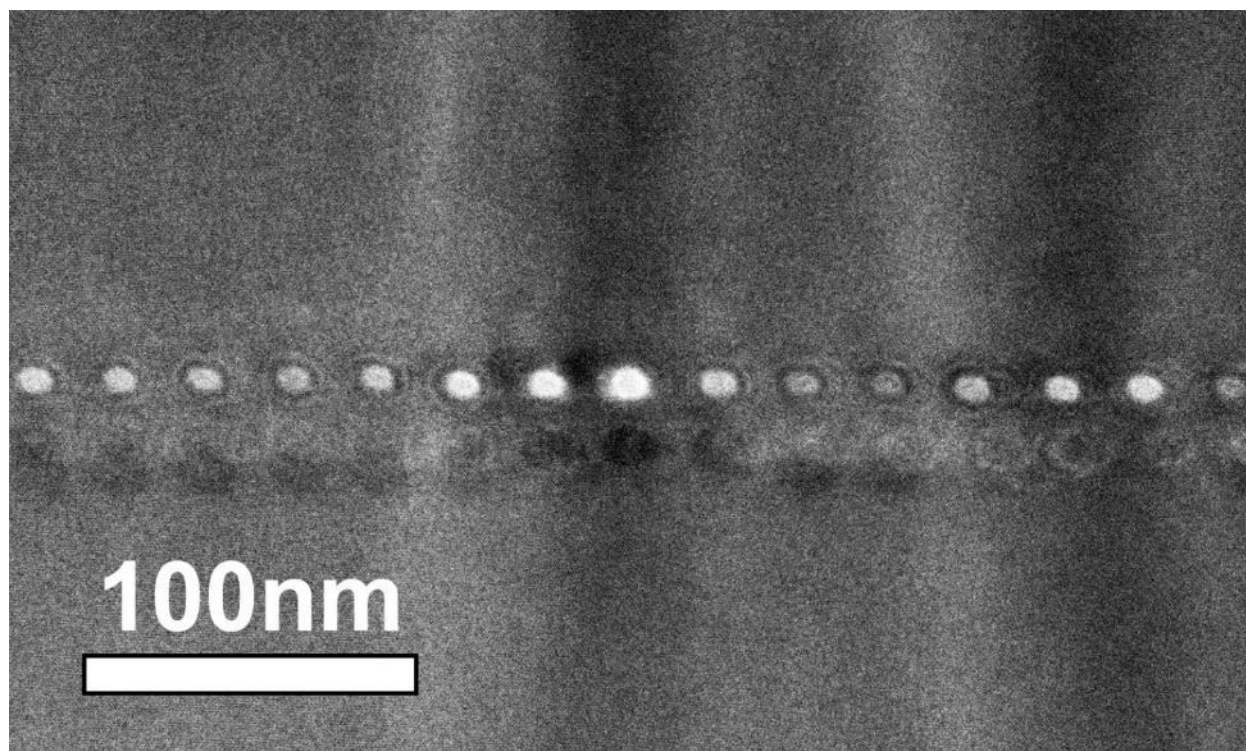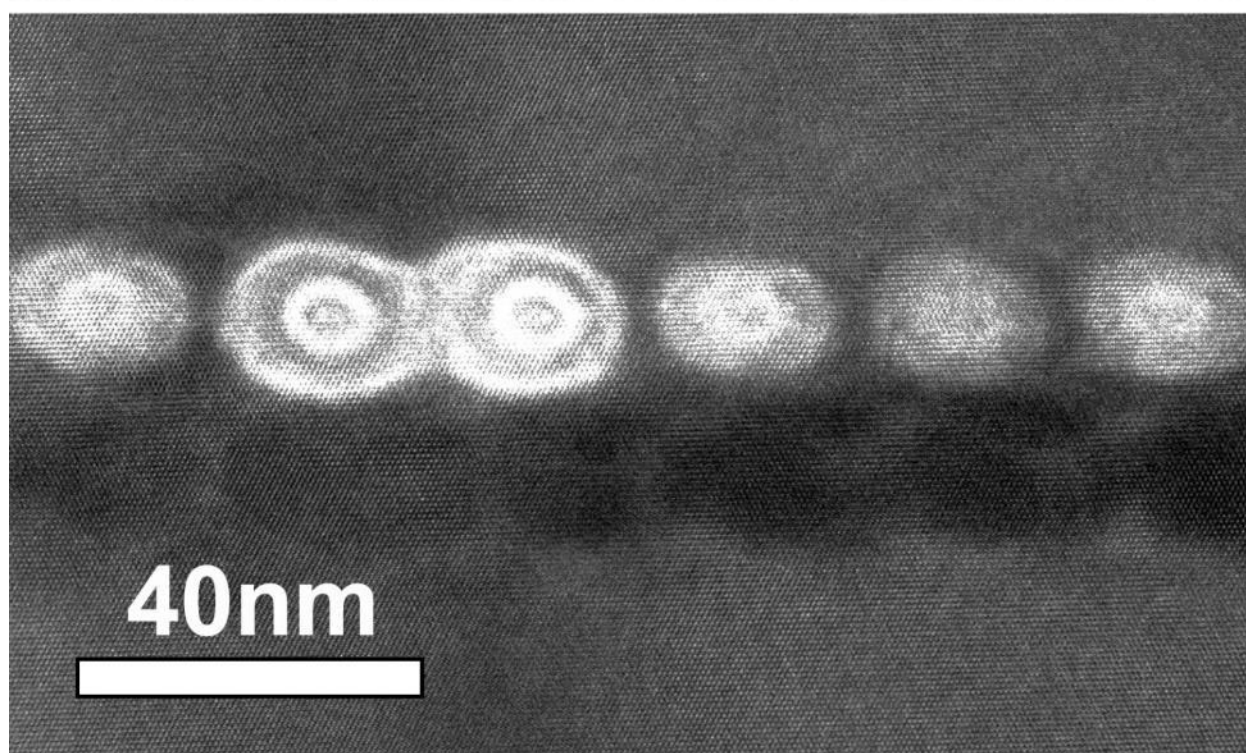

Figure S9 High resolution TEM image of sample 987L after collecting EDS data along the traverse. The equally spaced bright dots are the marks left by the focused electron beam. The damage zone as shown in the image is larger than the electron beam itself, and may interfere with one another, which makes the data not reliable for quantitative analysis for lamellae composition.

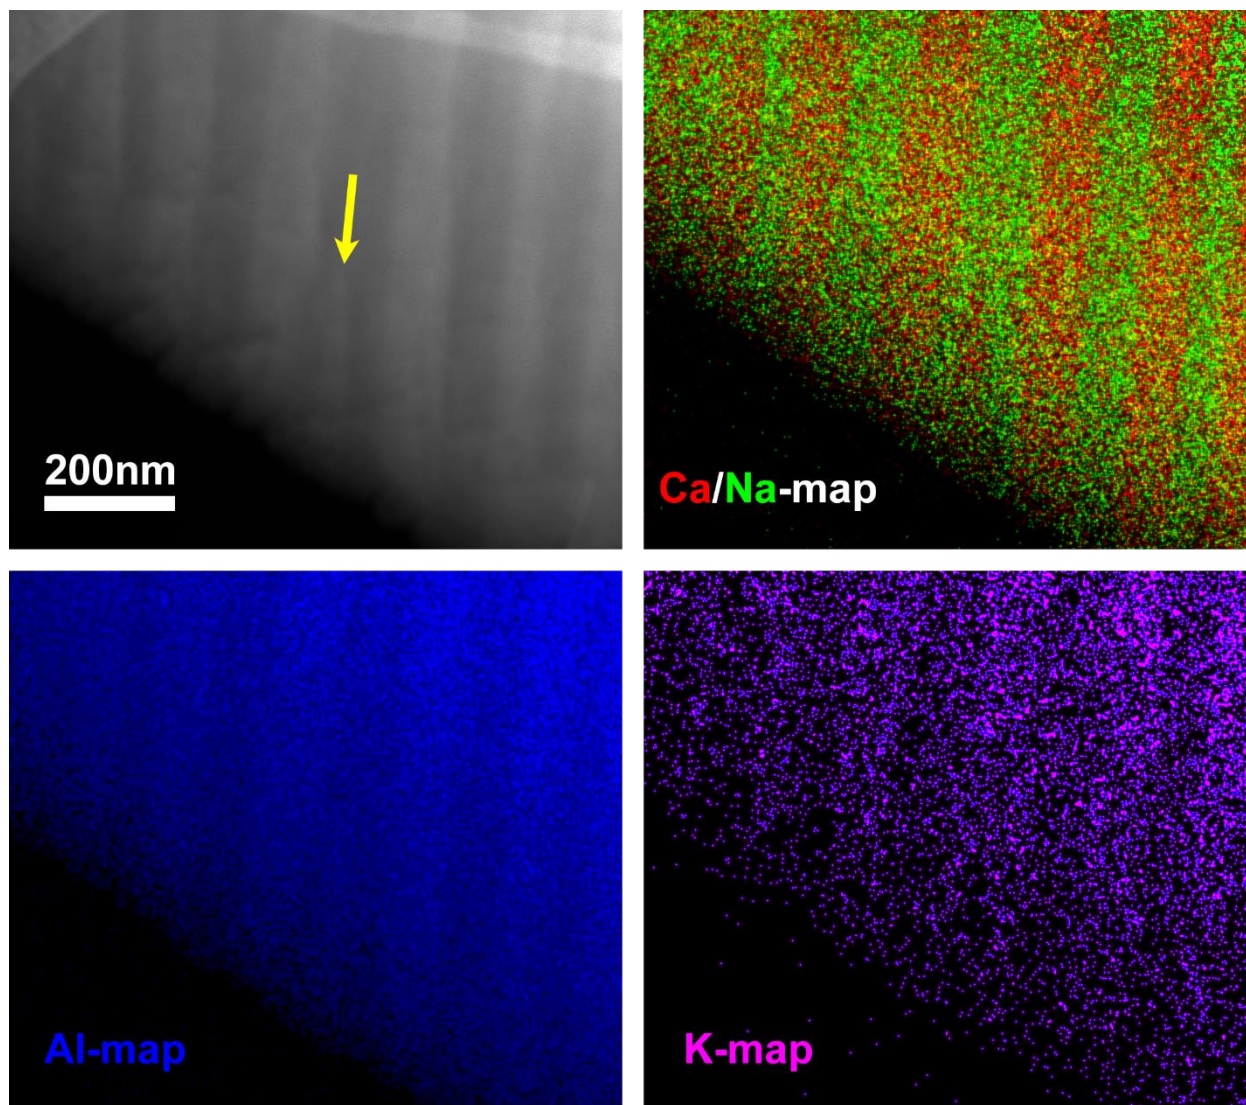

Figure S10 The HAADF STEM image of the blue Gem118 sample, along with the elemental maps of Ca, Na, Al, and K from the EDS map. Ca and Na are shown in the same map to enhance the contrast. The EDS map matches the STEM image perfectly, with Ca-rich lamellae brighter in the image, richer in Al and poorer in K. Even though the maps are much noisier than the STEM image, they show the same textures as in the STEM image.



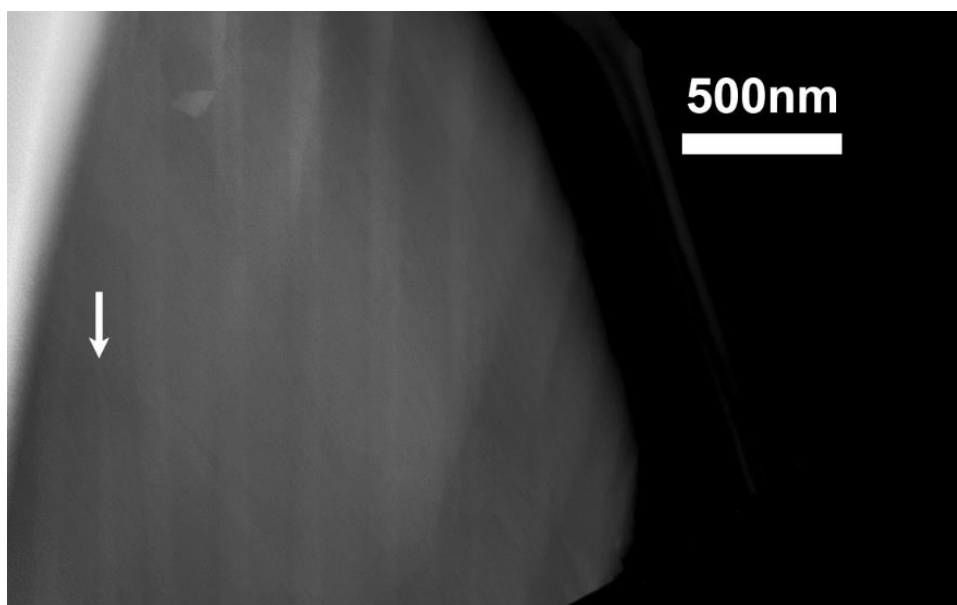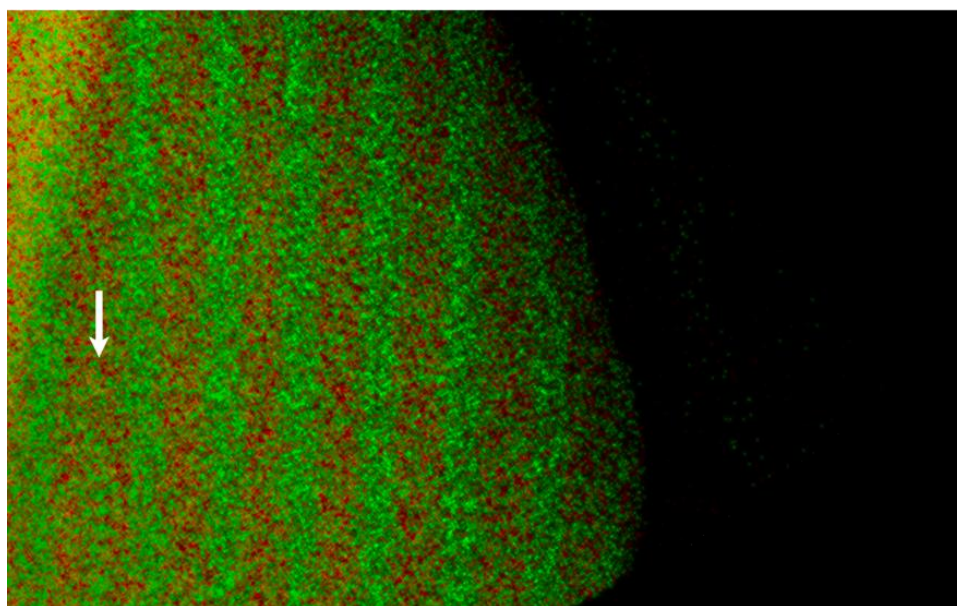

Figure S11 The HAADF STEM image and Ca/Na elemental map of the red Gem118 sample. The STEM image shows some strange contrast that does not correspond to the chemical composition, most likely resulting from some elastically scattered signals. Signals of Ca/Na counts in the EDS map are much better at showing the chemical differences between lamellae.



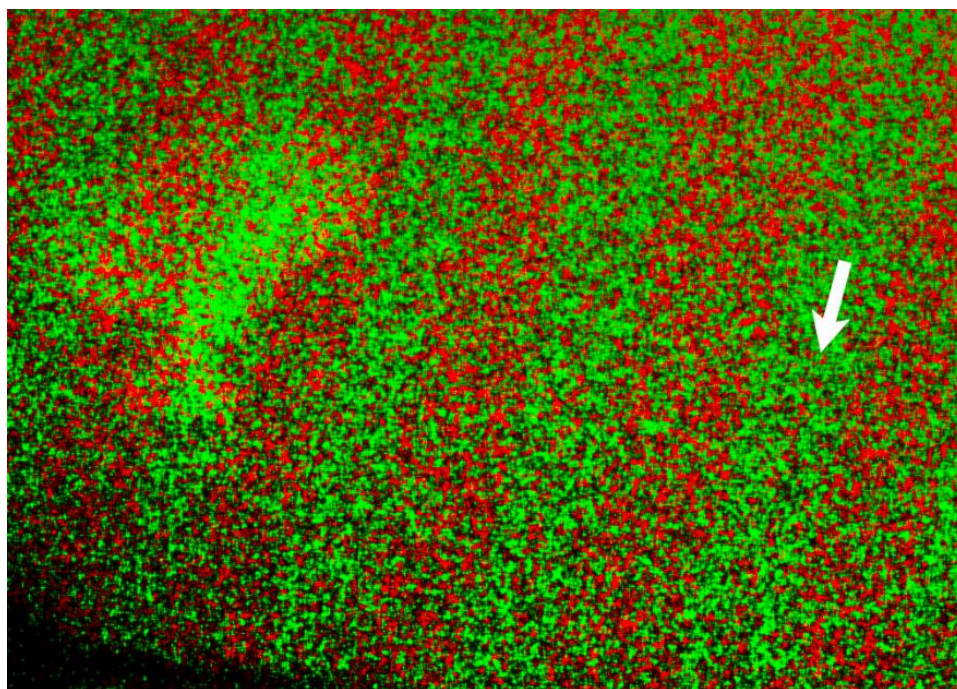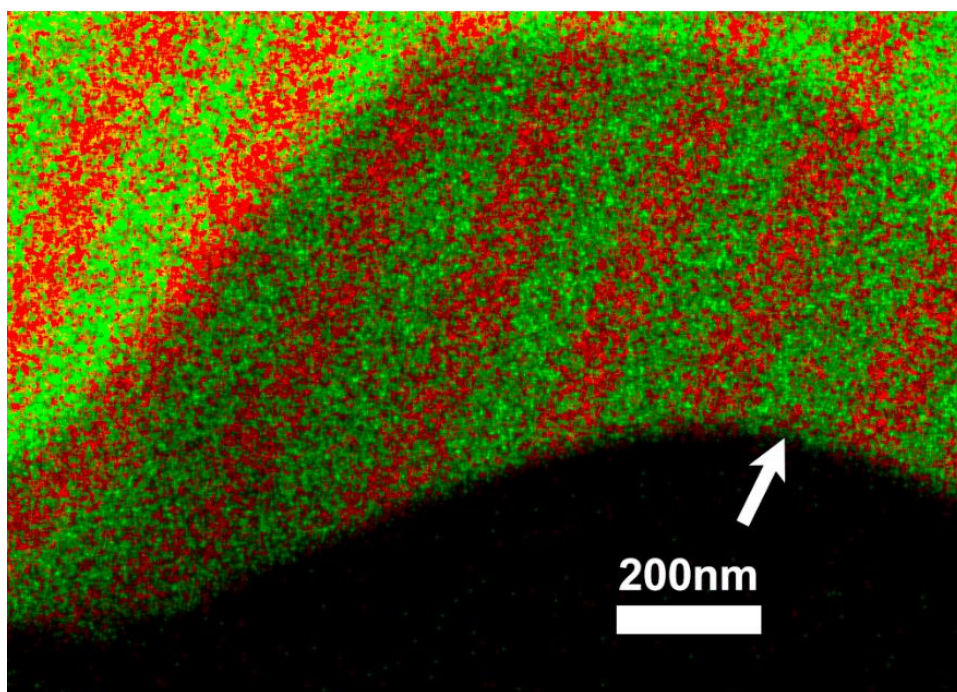

Figure S12 EDS maps of the red (top) and blue (bottom) areas in sample R2923. The lamellae thickness is very similar to that of sample Gem113. The contrast is also higher in the blue area than in the red, indicating larger chemical differences between Ca-rich and Na-rich lamellae in blue sample. The red lines in the center of Na-rich lamellae are also marked by white arrows.



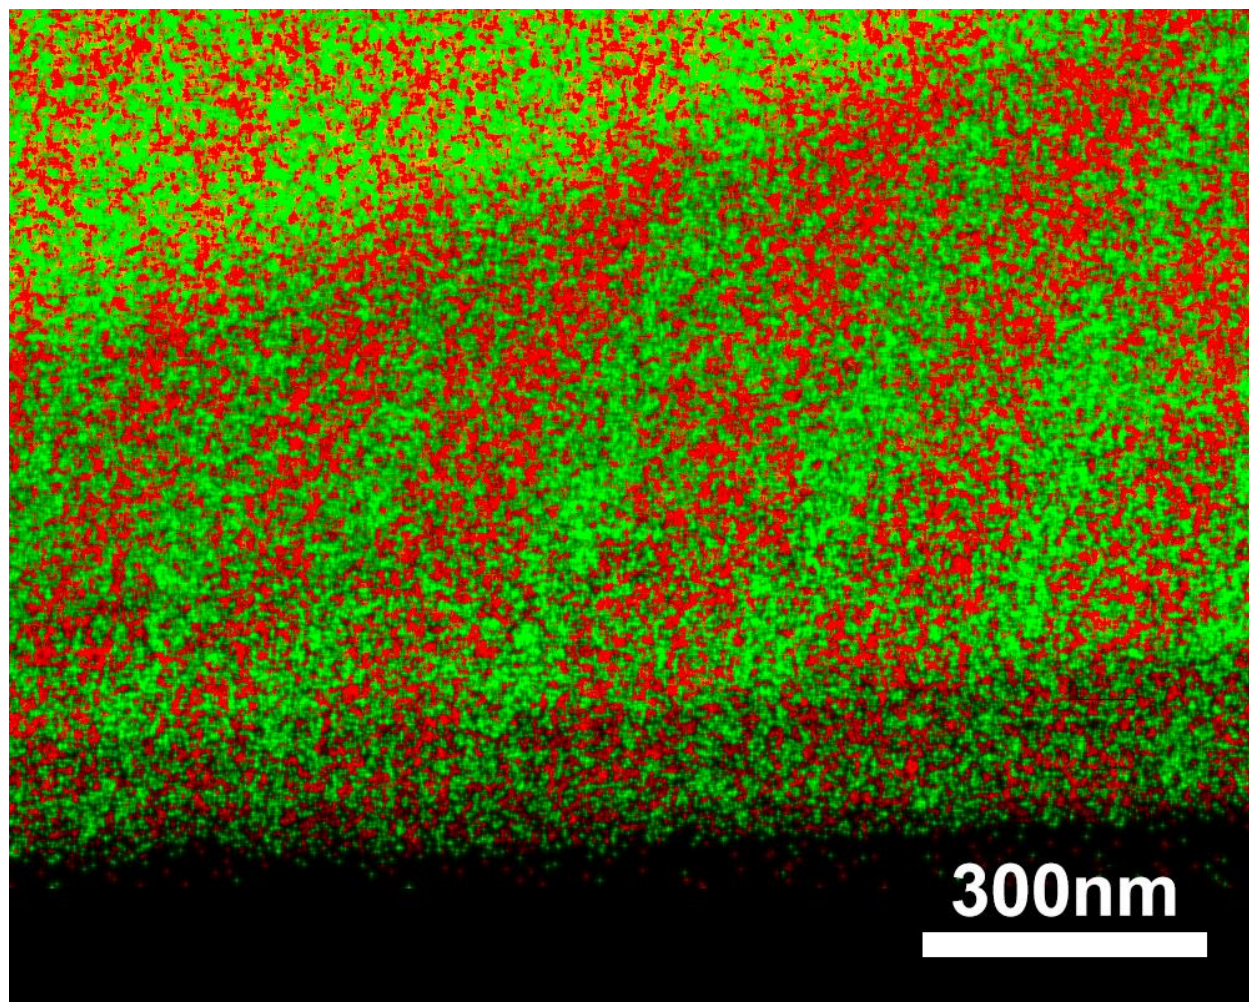

Figure S13 EDS map of the yellow VB sample. The volume ratio between Ca-rich and Na-rich lamellae is more than 2:1, even higher than the ratio in the red area of the other samples (MAD, R2923, Gem113, Gem118).

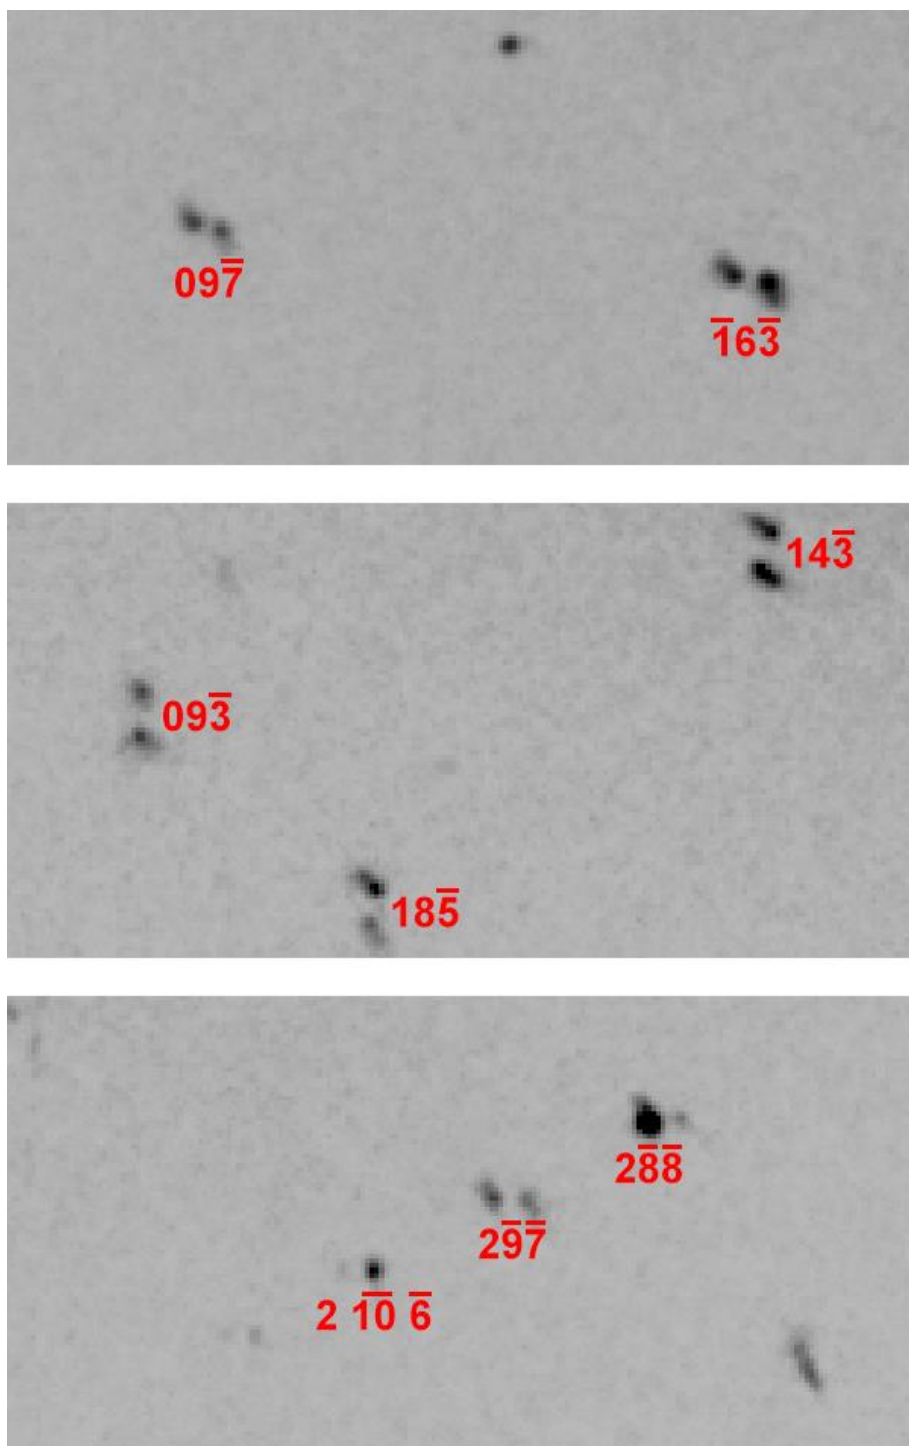

Figure S14 Selected frames from the single-crystal diffraction data of the red Gem118 sample. Two sets of *e*-reflection pairs are obviously shown in these frames. This is a very unique feature of the red Gem118 sample. All the other samples, even though also consisting of two phases of different compositions, show only one set of satellite reflections in the X-ray diffraction pattern. The indexing is based on anorthite cell.

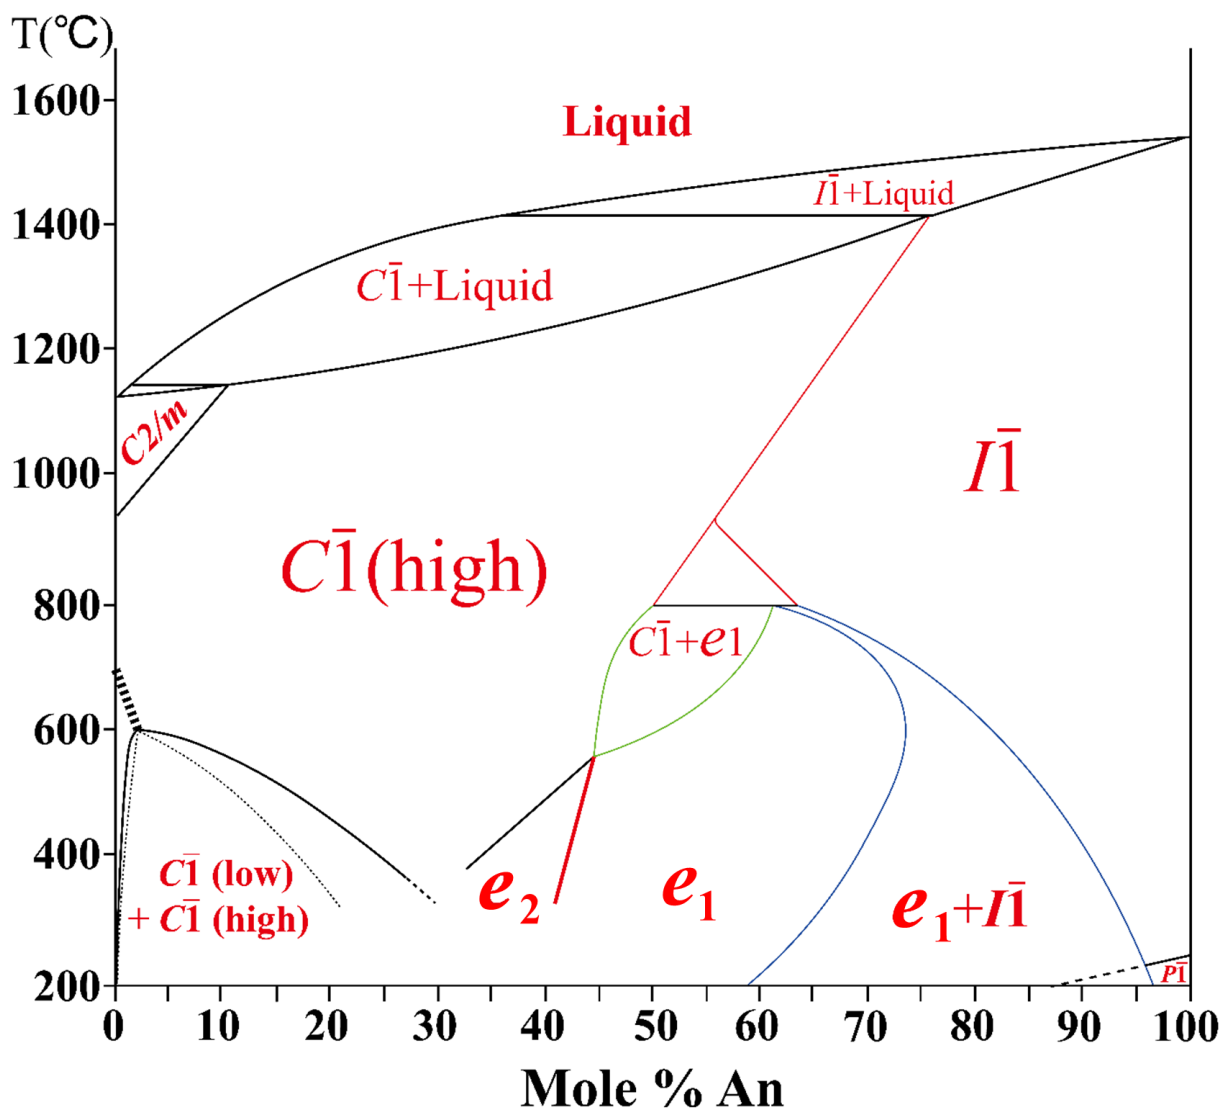

Figure S15 A complete binary phase diagram of the plagioclase feldspar with the topology shown in Figure 12c. The rest of the phase diagram would be the same for the other two topologies in Figure 12, mostly following Carpenter (1994).



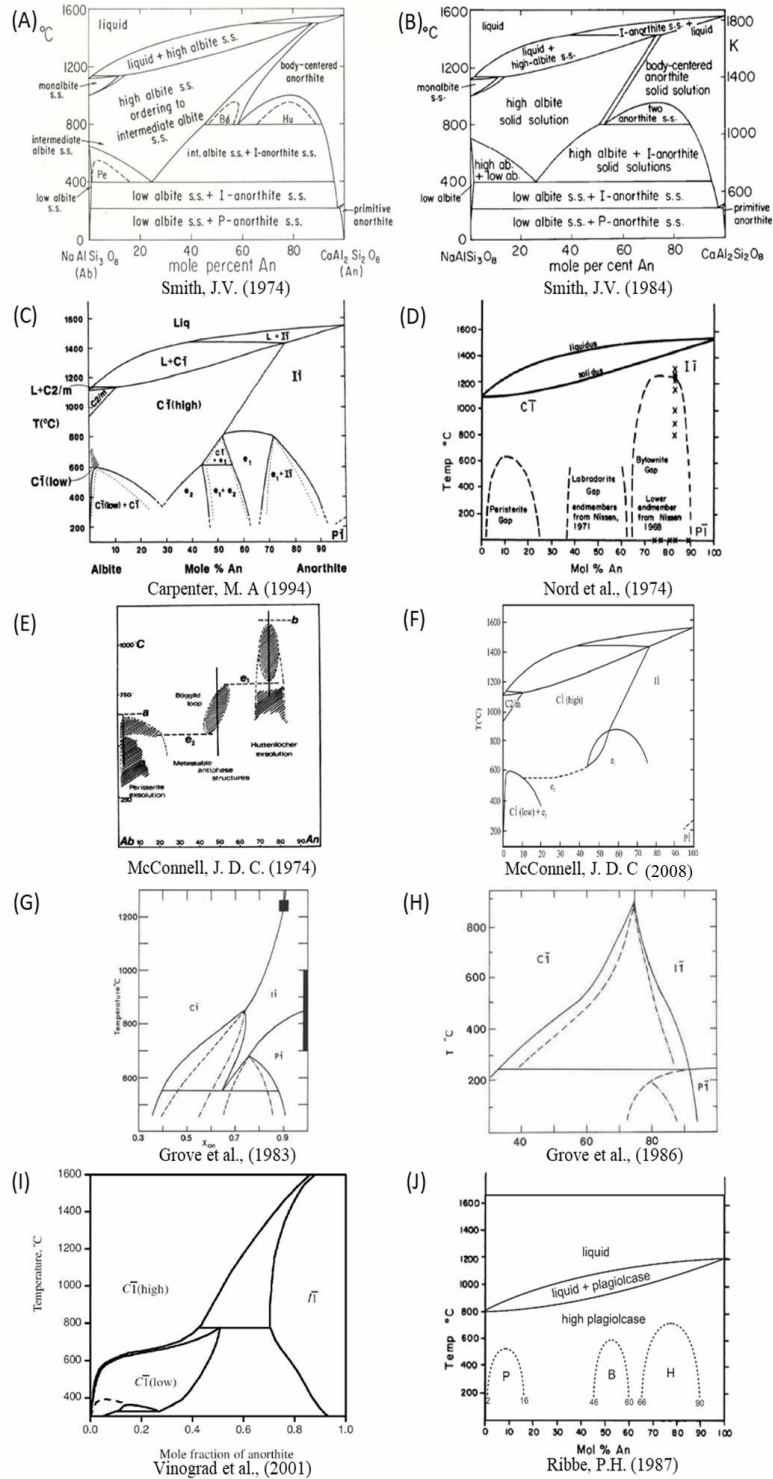

Figure S16 List of plagioclase phase diagrams (Smith 1974, 1986; McConnell 1974, 2008; Nord *et al.* 1974; Grove *et al.* 1983, 1986; Ribbe, 1987; Carpenter 1994; Vinograd *et al.* 2001).

Table S1 Electron microprobe analyses results of the plagioclase samples studied in this paper.

| Sample     | Oxide Weight%    |                                |       |        |                   |                  |         | Formula normalized to 8 oxygen |       |       |       |       |       |        | Composition                                             |
|------------|------------------|--------------------------------|-------|--------|-------------------|------------------|---------|--------------------------------|-------|-------|-------|-------|-------|--------|---------------------------------------------------------|
|            | SiO <sub>2</sub> | Al <sub>2</sub> O <sub>3</sub> | FeO   | CaO    | Na <sub>2</sub> O | K <sub>2</sub> O | Total   | Si                             | Al    | Fe    | Ca    | Na    | K     | Total  |                                                         |
| 987L       | 54.888           | 28.065                         | 0.088 | 10.009 | 5.958             | 0.129            | 99.136  | 2.494                          | 1.503 | 0.003 | 0.487 | 0.525 | 0.007 | 13.020 | An <sub>47.8</sub> Ab <sub>51.5</sub> Or <sub>0.7</sub> |
|            | 54.793           | 28.418                         | 0.019 | 10.017 | 6.022             | 0.121            | 99.390  | 2.484                          | 1.518 | 0.001 | 0.486 | 0.529 | 0.007 | 13.025 | An <sub>47.6</sub> Ab <sub>51.8</sub> Or <sub>0.7</sub> |
|            | 54.343           | 28.500                         | 0.013 | 9.999  | 5.986             | 0.157            | 98.998  | 2.474                          | 1.529 | 0.001 | 0.488 | 0.528 | 0.009 | 13.030 | An <sub>47.6</sub> Ab <sub>51.5</sub> Or <sub>0.9</sub> |
|            | 55.167           | 28.101                         | 0.008 | 9.585  | 6.156             | 0.088            | 99.106  | 2.503                          | 1.503 | 0.000 | 0.466 | 0.542 | 0.005 | 13.019 | An <sub>46.0</sub> Ab <sub>53.5</sub> Or <sub>0.5</sub> |
|            | 55.268           | 28.413                         | 0.052 | 9.918  | 5.891             | 0.108            | 99.650  | 2.495                          | 1.512 | 0.002 | 0.480 | 0.516 | 0.006 | 13.010 | An <sub>47.9</sub> Ab <sub>51.5</sub> Or <sub>0.6</sub> |
|            | 54.421           | 28.519                         | 0.056 | 10.218 | 5.896             | 0.102            | 99.212  | 2.473                          | 1.528 | 0.002 | 0.498 | 0.520 | 0.006 | 13.026 | An <sub>48.6</sub> Ab <sub>50.8</sub> Or <sub>0.6</sub> |
|            | 54.911           | 28.340                         | 0.054 | 10.103 | 5.871             | 0.120            | 99.399  | 2.488                          | 1.513 | 0.002 | 0.490 | 0.516 | 0.007 | 13.017 | An <sub>48.4</sub> Ab <sub>50.9</sub> Or <sub>0.7</sub> |
|            | 54.524           | 28.625                         | 0.045 | 10.066 | 5.939             | 0.106            | 99.305  | 2.474                          | 1.531 | 0.002 | 0.489 | 0.523 | 0.006 | 13.025 | An <sub>48.1</sub> Ab <sub>51.3</sub> Or <sub>0.6</sub> |
|            | 54.414           | 28.504                         | 0.022 | 10.399 | 5.555             | 0.161            | 99.055  | 2.475                          | 1.528 | 0.001 | 0.507 | 0.490 | 0.009 | 13.010 | An <sub>50.4</sub> Ab <sub>48.7</sub> Or <sub>0.9</sub> |
|            | 53.946           | 28.984                         | 0.061 | 10.588 | 5.562             | 0.091            | 99.233  | 2.452                          | 1.553 | 0.002 | 0.516 | 0.490 | 0.005 | 13.019 | An <sub>51.0</sub> Ab <sub>48.5</sub> Or <sub>0.5</sub> |
|            | 54.155           | 28.890                         | 0.041 | 10.455 | 5.762             | 0.078            | 99.381  | 2.458                          | 1.545 | 0.002 | 0.508 | 0.507 | 0.005 | 13.025 | An <sub>49.8</sub> Ab <sub>49.7</sub> Or <sub>0.4</sub> |
|            | 54.304           | 29.381                         | 0.007 | 10.820 | 5.345             | 0.086            | 99.943  | 2.449                          | 1.562 | 0.000 | 0.523 | 0.467 | 0.005 | 13.006 | An <sub>52.5</sub> Ab <sub>47.0</sub> Or <sub>0.5</sub> |
| MAD-orange | 54.634           | 28.958                         | 0.142 | 10.663 | 5.001             | 0.519            | 99.917  | 2.467                          | 1.541 | 0.005 | 0.516 | 0.438 | 0.030 | 12.997 | An <sub>52.4</sub> Ab <sub>44.5</sub> Or <sub>3.0</sub> |
|            | 55.139           | 28.577                         | 0.053 | 10.824 | 5.040             | 0.499            | 100.132 | 2.483                          | 1.517 | 0.002 | 0.522 | 0.440 | 0.029 | 12.993 | An <sub>52.7</sub> Ab <sub>44.4</sub> Or <sub>2.9</sub> |
|            | 55.076           | 28.441                         | 0.152 | 10.700 | 5.176             | 0.446            | 99.990  | 2.485                          | 1.512 | 0.006 | 0.517 | 0.453 | 0.026 | 12.998 | An <sub>51.9</sub> Ab <sub>45.5</sub> Or <sub>2.6</sub> |
|            | 54.893           | 28.515                         | 0.018 | 11.029 | 5.097             | 0.431            | 99.982  | 2.478                          | 1.517 | 0.001 | 0.533 | 0.446 | 0.025 | 12.999 | An <sub>53.1</sub> Ab <sub>44.4</sub> Or <sub>2.5</sub> |
| MAD-yellow | 55.029           | 28.582                         | 0.172 | 10.517 | 5.311             | 0.494            | 100.105 | 2.480                          | 1.518 | 0.006 | 0.508 | 0.464 | 0.028 | 13.005 | An <sub>50.8</sub> Ab <sub>46.4</sub> Or <sub>2.8</sub> |
|            | 54.050           | 29.010                         | 0.121 | 10.805 | 5.350             | 0.513            | 99.850  | 2.448                          | 1.549 | 0.005 | 0.524 | 0.470 | 0.030 | 13.026 | An <sub>51.2</sub> Ab <sub>45.9</sub> Or <sub>2.9</sub> |

|             |        |        |       |        |       |       |         |       |       |       |       |       |       |        |                                                         |
|-------------|--------|--------|-------|--------|-------|-------|---------|-------|-------|-------|-------|-------|-------|--------|---------------------------------------------------------|
|             | 54.717 | 28.739 | 0.127 | 10.636 | 5.273 | 0.487 | 99.981  | 2.470 | 1.529 | 0.005 | 0.515 | 0.462 | 0.028 | 13.009 | An <sub>51.2</sub> Ab <sub>46.0</sub> Or <sub>2.8</sub> |
|             | 54.141 | 28.695 | 0.090 | 10.649 | 5.318 | 0.509 | 99.403  | 2.461 | 1.537 | 0.003 | 0.519 | 0.469 | 0.030 | 13.018 | An <sub>51.0</sub> Ab <sub>46.1</sub> Or <sub>2.9</sub> |
|             | 53.816 | 28.468 | 0.027 | 10.609 | 5.293 | 0.484 | 98.697  | 2.463 | 1.535 | 0.001 | 0.520 | 0.470 | 0.028 | 13.017 | An <sub>51.1</sub> Ab <sub>46.1</sub> Or <sub>2.8</sub> |
|             | 55.160 | 29.055 | 0.090 | 10.641 | 5.273 | 0.483 | 100.702 | 2.471 | 1.534 | 0.003 | 0.511 | 0.458 | 0.028 | 13.004 | An <sub>51.3</sub> Ab <sub>46.0</sub> Or <sub>2.8</sub> |
| MAD-blue    | 55.655 | 28.276 | 0.063 | 9.924  | 5.492 | 0.536 | 99.947  | 2.506 | 1.501 | 0.002 | 0.479 | 0.479 | 0.031 | 12.999 | An <sub>48.6</sub> Ab <sub>48.5</sub> Or <sub>3.1</sub> |
|             | 55.153 | 27.853 | 0.117 | 10.018 | 5.339 | 0.474 | 98.956  | 2.509 | 1.493 | 0.004 | 0.488 | 0.471 | 0.028 | 12.994 | An <sub>49.5</sub> Ab <sub>47.7</sub> Or <sub>2.8</sub> |
|             | 55.506 | 28.283 | 0.123 | 10.290 | 5.524 | 0.423 | 100.150 | 2.497 | 1.500 | 0.004 | 0.496 | 0.482 | 0.024 | 13.004 | An <sub>49.5</sub> Ab <sub>48.1</sub> Or <sub>2.4</sub> |
|             | 55.757 | 28.376 | 0.117 | 10.235 | 5.543 | 0.435 | 100.463 | 2.500 | 1.499 | 0.004 | 0.492 | 0.482 | 0.025 | 13.002 | An <sub>49.2</sub> Ab <sub>48.3</sub> Or <sub>2.5</sub> |
|             | 56.331 | 28.234 | 0.110 | 10.260 | 5.599 | 0.405 | 100.939 | 2.512 | 1.484 | 0.004 | 0.490 | 0.484 | 0.023 | 12.997 | An <sub>49.1</sub> Ab <sub>48.5</sub> Or <sub>2.3</sub> |
|             | 55.467 | 28.445 | 0.114 | 10.307 | 5.661 | 0.423 | 100.417 | 2.491 | 1.505 | 0.004 | 0.496 | 0.493 | 0.024 | 13.013 | An <sub>49.0</sub> Ab <sub>48.7</sub> Or <sub>2.4</sub> |
| R2923-red   | 54.958 | 27.991 | 0.045 | 10.785 | 5.06  | 0.467 | 99.305  | 2.495 | 1.498 | 0.002 | 0.525 | 0.445 | 0.027 | 12.992 | An <sub>52.6</sub> Ab <sub>44.7</sub> Or <sub>2.7</sub> |
|             | 54.24  | 28.24  | 0.03  | 11.22  | 5.263 | 0.427 | 99.419  | 2.468 | 1.514 | 0.001 | 0.547 | 0.464 | 0.025 | 13.019 | An <sub>52.8</sub> Ab <sub>44.8</sub> Or <sub>2.4</sub> |
|             | 54.007 | 28.089 | 0.149 | 10.883 | 5.32  | 0.459 | 98.907  | 2.47  | 1.514 | 0.006 | 0.533 | 0.472 | 0.027 | 13.022 | An <sub>51.7</sub> Ab <sub>45.7</sub> Or <sub>2.6</sub> |
|             | 53.567 | 28.201 | 0.095 | 11.13  | 5.187 | 0.44  | 98.619  | 2.459 | 1.526 | 0.004 | 0.547 | 0.462 | 0.026 | 13.022 | An <sub>52.9</sub> Ab <sub>44.6</sub> Or <sub>2.5</sub> |
| R2923-blue  | 54.381 | 27.900 | 0.260 | 10.364 | 5.314 | 0.442 | 98.661  | 2.488 | 1.505 | 0.010 | 0.508 | 0.471 | 0.026 | 13.008 | An <sub>50.5</sub> Ab <sub>46.9</sub> Or <sub>2.6</sub> |
|             | 54.599 | 27.987 | 0.292 | 10.343 | 5.299 | 0.464 | 98.983  | 2.490 | 1.504 | 0.011 | 0.505 | 0.469 | 0.027 | 13.006 | An <sub>50.5</sub> Ab <sub>46.8</sub> Or <sub>2.7</sub> |
|             | 54.420 | 27.903 | 0.281 | 10.379 | 5.365 | 0.414 | 98.763  | 2.488 | 1.503 | 0.011 | 0.508 | 0.476 | 0.024 | 13.010 | An <sub>50.4</sub> Ab <sub>47.2</sub> Or <sub>2.4</sub> |
|             | 54.473 | 27.940 | 0.177 | 10.365 | 5.369 | 0.430 | 98.755  | 2.489 | 1.505 | 0.007 | 0.507 | 0.476 | 0.025 | 13.009 | An <sub>50.3</sub> Ab <sub>47.2</sub> Or <sub>2.5</sub> |
| Gem113-Blue | 55.292 | 28.591 | 0.342 | 10.898 | 5.151 | 0.404 | 100.677 | 2.480 | 1.512 | 0.013 | 0.524 | 0.448 | 0.023 | 13.000 | An <sub>52.6</sub> Ab <sub>45.0</sub> Or <sub>2.3</sub> |
|             | 56.138 | 28.399 | 0.339 | 10.734 | 5.261 | 0.431 | 101.302 | 2.500 | 1.491 | 0.013 | 0.512 | 0.454 | 0.024 | 12.994 | An <sub>51.7</sub> Ab <sub>45.8</sub> Or <sub>2.5</sub> |
|             | 55.831 | 28.283 | 0.251 | 11.039 | 5.235 | 0.417 | 101.056 | 2.495 | 1.489 | 0.009 | 0.528 | 0.454 | 0.024 | 12.999 | An <sub>52.5</sub> Ab <sub>45.1</sub> Or <sub>2.4</sub> |

|                 |        |        |       |        |       |       |         |       |       |       |       |       |       |        |                                                         |
|-----------------|--------|--------|-------|--------|-------|-------|---------|-------|-------|-------|-------|-------|-------|--------|---------------------------------------------------------|
|                 | 56.070 | 28.427 | 0.319 | 11.024 | 5.180 | 0.394 | 101.413 | 2.496 | 1.491 | 0.012 | 0.526 | 0.447 | 0.022 | 12.994 | An <sub>52.8</sub> Ab <sub>44.9</sub> Or <sub>2.2</sub> |
|                 | 55.559 | 28.835 | 0.299 | 11.073 | 5.216 | 0.404 | 101.387 | 2.476 | 1.514 | 0.011 | 0.529 | 0.451 | 0.023 | 13.004 | An <sub>52.7</sub> Ab <sub>45.0</sub> Or <sub>2.3</sub> |
|                 | 55.716 | 28.590 | 0.302 | 10.869 | 5.133 | 0.391 | 101.002 | 2.489 | 1.505 | 0.011 | 0.520 | 0.445 | 0.022 | 12.992 | An <sub>52.7</sub> Ab <sub>45.0</sub> Or <sub>2.3</sub> |
| Gem113<br>-red  | 55.250 | 28.516 | 0.251 | 11.097 | 4.722 | 0.408 | 100.244 | 2.485 | 1.512 | 0.009 | 0.535 | 0.412 | 0.023 | 12.976 | An <sub>55.1</sub> Ab <sub>42.5</sub> Or <sub>2.4</sub> |
|                 | 55.446 | 28.348 | 0.234 | 11.157 | 4.956 | 0.607 | 100.748 | 2.487 | 1.499 | 0.009 | 0.536 | 0.431 | 0.035 | 12.996 | An <sub>53.5</sub> Ab <sub>43.0</sub> Or <sub>3.5</sub> |
|                 | 55.343 | 28.338 | 0.289 | 10.954 | 4.986 | 0.344 | 100.255 | 2.490 | 1.503 | 0.011 | 0.528 | 0.435 | 0.020 | 12.986 | An <sub>53.7</sub> Ab <sub>44.3</sub> Or <sub>2.0</sub> |
|                 | 55.472 | 28.477 | 0.337 | 11.216 | 4.936 | 0.401 | 100.839 | 2.484 | 1.503 | 0.013 | 0.538 | 0.429 | 0.023 | 12.990 | An <sub>54.4</sub> Ab <sub>43.3</sub> Or <sub>2.3</sub> |
|                 | 54.426 | 28.053 | 1.810 | 10.875 | 4.886 | 0.405 | 100.454 | 2.465 | 1.498 | 0.069 | 0.528 | 0.429 | 0.023 | 13.012 | An <sub>53.8</sub> Ab <sub>43.8</sub> Or <sub>2.4</sub> |
|                 | 55.650 | 28.183 | 0.259 | 11.215 | 4.982 | 0.418 | 100.707 | 2.495 | 1.489 | 0.010 | 0.539 | 0.433 | 0.024 | 12.989 | An <sub>54.1</sub> Ab <sub>43.5</sub> Or <sub>2.4</sub> |
| Gem118<br>-red  | 53.710 | 28.070 | 0.196 | 11.589 | 4.471 | 0.438 | 98.474  | 2.466 | 1.519 | 0.008 | 0.570 | 0.398 | 0.026 | 12.986 | An <sub>57.4</sub> Ab <sub>40.1</sub> Or <sub>2.6</sub> |
|                 | 54.061 | 28.523 | 0.288 | 11.841 | 4.435 | 0.508 | 99.656  | 2.456 | 1.527 | 0.011 | 0.576 | 0.391 | 0.029 | 12.990 | An <sub>57.8</sub> Ab <sub>39.2</sub> Or <sub>3.0</sub> |
|                 | 53.739 | 28.836 | 0.296 | 11.906 | 4.438 | 0.473 | 99.689  | 2.442 | 1.544 | 0.011 | 0.580 | 0.391 | 0.027 | 12.995 | An <sub>58.1</sub> Ab <sub>39.2</sub> Or <sub>2.7</sub> |
|                 | 54.128 | 28.567 | 0.256 | 11.965 | 4.497 | 0.527 | 99.940  | 2.454 | 1.526 | 0.010 | 0.581 | 0.395 | 0.030 | 12.996 | An <sub>57.7</sub> Ab <sub>39.3</sub> Or <sub>3.0</sub> |
|                 | 54.123 | 28.798 | 0.318 | 11.892 | 4.180 | 0.457 | 99.768  | 2.453 | 1.538 | 0.012 | 0.578 | 0.367 | 0.026 | 12.975 | An <sub>59.5</sub> Ab <sub>37.8</sub> Or <sub>2.7</sub> |
|                 | 54.122 | 28.840 | 0.303 | 11.699 | 4.448 | 0.408 | 99.820  | 2.452 | 1.540 | 0.011 | 0.568 | 0.391 | 0.024 | 12.985 | An <sub>57.8</sub> Ab <sub>39.8</sub> Or <sub>2.4</sub> |
| Gem118<br>-blue | 53.447 | 28.059 | 0.266 | 11.322 | 4.733 | 0.522 | 98.348  | 2.461 | 1.522 | 0.010 | 0.558 | 0.422 | 0.031 | 13.005 | An <sub>55.2</sub> Ab <sub>41.8</sub> Or <sub>3.0</sub> |
|                 | 54.656 | 27.652 | 0.238 | 11.530 | 4.825 | 0.692 | 99.594  | 2.486 | 1.482 | 0.009 | 0.562 | 0.426 | 0.040 | 13.005 | An <sub>54.7</sub> Ab <sub>41.4</sub> Or <sub>3.9</sub> |
|                 | 53.801 | 27.638 | 0.251 | 11.224 | 4.690 | 0.533 | 98.136  | 2.480 | 1.501 | 0.010 | 0.554 | 0.419 | 0.031 | 12.995 | An <sub>55.2</sub> Ab <sub>41.7</sub> Or <sub>3.1</sub> |
|                 | 54.151 | 27.729 | 0.278 | 11.165 | 4.797 | 0.495 | 98.615  | 2.483 | 1.498 | 0.011 | 0.549 | 0.426 | 0.029 | 12.996 | An <sub>54.6</sub> Ab <sub>42.5</sub> Or <sub>2.9</sub> |



Table S2 Intensity ratios from TEM-EDS spectrum of individual lamellae and the calibrated An# based on bulk composition and volume ratio between lamellae. The An# bulk is fixed from the EPMA analyses, and the  $k$ -factor is calculated by fitting the volume ratio to the predetermined number (2:1 for red area and 1:1 for blue area).

| Sample          | $\frac{I_{Ca}}{I_{Na}}$ of<br>Ca-rich<br>lamella | $\frac{I_{Ca}}{I_{Na}}$ of<br>Na-rich<br>lamella | $k$  | An#<br>Ca-rich<br>lamella | An#<br>Na-rich<br>lamella | An#<br>Diff. | An#<br>Bulk | Volume<br>Ratio $\frac{Ca-rich}{Na-rich}$ |
|-----------------|--------------------------------------------------|--------------------------------------------------|------|---------------------------|---------------------------|--------------|-------------|-------------------------------------------|
| R2923<br>-red   | 2.860                                            | 1.922                                            | 2.27 | 55.7                      | 45.8                      | 9.9          | 52.5        | 2.0                                       |
|                 | 2.916                                            | 1.958                                            | 2.31 | 55.8                      | 45.9                      | 9.9          | 52.5        | 2.0                                       |
|                 | 3.140                                            | 2.080                                            | 2.47 | 56.0                      | 45.7                      | 10.3         | 52.5        | 2.0                                       |
|                 | 3.052                                            | 2.087                                            | 2.43 | 55.7                      | 46.2                      | 9.5          | 52.5        | 2.0                                       |
|                 | 3.085                                            | 2.103                                            | 2.46 | 55.6                      | 46.1                      | 9.5          | 52.5        | 2.0                                       |
| R2923<br>-blue  | 2.672                                            | 1.603                                            | 2.03 | 56.8                      | 44.1                      | 12.7         | 50.5        | 1.0                                       |
|                 | 2.691                                            | 1.495                                            | 1.96 | 57.9                      | 43.3                      | 14.6         | 50.5        | 1.0                                       |
|                 | 2.746                                            | 1.482                                            | 1.98 | 58.1                      | 42.8                      | 15.3         | 50.5        | 1.0                                       |
|                 | 2.824                                            | 1.525                                            | 2.03 | 58.2                      | 42.9                      | 15.3         | 50.5        | 1.0                                       |
| Gem113<br>-red  | 2.047                                            | 1.417                                            | 1.54 | 57.1                      | 47.9                      | 9.2          | 54.0        | 2.0                                       |
|                 | 2.095                                            | 1.476                                            | 1.59 | 56.8                      | 48.1                      | 8.7          | 54.0        | 2.1                                       |
|                 | 1.809                                            | 1.252                                            | 1.36 | 57.1                      | 47.9                      | 9.2          | 54.0        | 2.0                                       |
|                 | 1.867                                            | 1.319                                            | 1.42 | 56.8                      | 48.2                      | 8.7          | 54.0        | 2.1                                       |
|                 | 1.351                                            | 0.905                                            | 1.01 | 57.2                      | 47.3                      | 10.0         | 54.0        | 2.1                                       |
|                 | 1.367                                            | 0.882                                            | 1.01 | 57.5                      | 46.6                      | 10.9         | 54.0        | 2.1                                       |
|                 | 1.371                                            | 0.911                                            | 1.02 | 57.3                      | 47.2                      | 10.2         | 54.0        | 2.0                                       |
| Gem113<br>-blue | 1.244                                            | 0.700                                            | 0.86 | 59.1                      | 44.9                      | 14.2         | 52.0        | 1.0                                       |
|                 | 1.251                                            | 0.706                                            | 0.87 | 59.0                      | 44.8                      | 14.2         | 52.0        | 1.0                                       |
|                 | 1.150                                            | 0.658                                            | 0.80 | 59.0                      | 45.1                      | 13.9         | 52.0        | 1.0                                       |
| VB<br>-yellow   | 2.439                                            | 1.508                                            | 1.70 | 58.9                      | 47.0                      | 11.9         | 55.0        | 2.0                                       |
|                 | 2.523                                            | 1.710                                            | 1.81 | 58.2                      | 48.6                      | 9.7          | 55.0        | 2.0                                       |
|                 | 2.667                                            | 1.776                                            | 1.90 | 58.4                      | 48.3                      | 10.1         | 55.0        | 2.0                                       |
|                 | 2.531                                            | 1.682                                            | 1.80 | 58.4                      | 48.3                      | 10.1         | 55.0        | 1.9                                       |
|                 | 2.889                                            | 1.847                                            | 2.03 | 58.7                      | 47.6                      | 11.1         | 55.0        | 2.0                                       |
|                 | 3.170                                            | 1.967                                            | 2.21 | 58.9                      | 47.1                      | 11.8         | 55.0        | 2.0                                       |
|                 | 3.078                                            | 2.111                                            | 2.22 | 58.1                      | 48.7                      | 9.4          | 55.0        | 2.0                                       |
| Gem118<br>-red  | 3.988                                            | 2.228                                            | 2.37 | 62.7                      | 48.5                      | 14.3         | 58.0        | 2.0                                       |
|                 | 3.908                                            | 2.214                                            | 2.33 | 62.6                      | 48.7                      | 13.9         | 58.0        | 2.0                                       |
|                 | 3.616                                            | 1.922                                            | 2.11 | 63.2                      | 47.7                      | 15.5         | 58.0        | 2.0                                       |
|                 | 3.500                                            | 1.854                                            | 2.04 | 63.2                      | 47.6                      | 15.5         | 58.0        | 2.0                                       |
| Gem118<br>-blue | 3.510                                            | 1.913                                            | 2.11 | 62.5                      | 47.5                      | 14.8         | 55.0        | 1.0                                       |
|                 | 3.479                                            | 1.976                                            | 2.14 | 61.9                      | 48.0                      | 13.9         | 55.0        | 1.0                                       |
|                 | 3.853                                            | 2.026                                            | 2.27 | 62.9                      | 47.2                      | 15.8         | 55.0        | 1.0                                       |
|                 | 4.167                                            | 2.254                                            | 2.49 | 62.6                      | 47.5                      | 15.1         | 55.0        | 1.0                                       |
|                 | 4.240                                            | 2.291                                            | 2.54 | 62.5                      | 47.4                      | 15.1         | 55.0        | 1.0                                       |

|  |       |       |      |      |      |      |      |     |
|--|-------|-------|------|------|------|------|------|-----|
|  | 4.569 | 2.461 | 2.73 | 62.6 | 47.4 | 15.2 | 55.0 | 1.0 |
|--|-------|-------|------|------|------|------|------|-----|

## References

- Carpenter, M. A. (1994) Subsolidus phase-relations of the plagioclase feldspar solid-solution. In Ian Parsons, Ed., *Feldspars and Their Reactions* Vol. 421, pp. 221–269. Kluwer Academic Publishers, Netherlands.
- Grove, T. L., Ferry, J. M., and Spear, F. S. (1983) Phase transitions and decomposition relations in calcic plagioclase. *American Mineralogist*, 68, 41-59.
- Grove, T. L., Ferry, J. M., and Spear, F. S. (1986) Phase transitions in calcic plagioclase; a correction and further discussion. *American Mineralogist*, 71, 1049-1050.
- McConnell, J. D. C. (1974) Electron-optical study of the fine structure of a schiller labradorite. In W.S. MacKenzie and J. Zussman, Eds., *The Feldspars* pp. 478–490. Manchester University Press, New York.
- McConnell, J. D. C. (2008) The origin and characteristics of the incommensurate structures in the plagioclase feldspars. *The Canadian Mineralogist*, 46, 1389-1400.
- Nord, G. L., Heuer, A. H, and Lally, J. S. (1974) Transmission electron microscopy of substructures in Stillwater bytownite. In W. S. MacKenzie and J. Zussman, Eds., *The Feldspars*, p. 522- 535. Manchester University Press, New York.
- Ribbe, P.H. (1987) *McGraw-Hill Encyclopedia of Science & Technology: An International Reference Work in Twenty Volumes Including an Index* Vol. 7, pp. 38–47. McGraw-Hill, New York.
- Smith, J. V. (1974). *Feldspar Minerals*, 692 p. Springer-Verlag, Berlin, New York.

Smith, J. V. (1984). Phase relations of plagioclase feldspars. In W. L. Brown, Eds., Feldspars and feldspathoids, p. 55-94. Springer, Netherlands.

Vinograd, V. L., Putnis, A., and Kroll, H. (2001) Structural discontinuities in plagioclase and constraints on mixing properties of the low series: A computational study. Mineralogical Magazine, 65, 1-31.
